# Supplementary material
Source: MDPI journal article supplement (https://www.mdpi.com/1099-4300/25/10/1383)
Supplement: s1 [file s1]

# Supplement Material

Figure S1

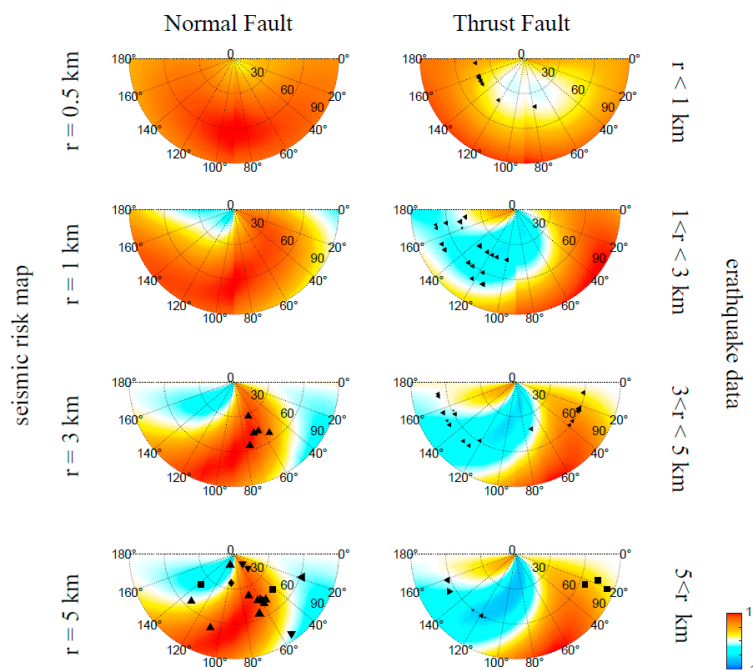

**Figure S1.** Projection of earthquakes onto seismic risk map at different distances. The background maps are from snapshots of normalized coulomb failure stress for normal and thrust faults at  $r = 0.5, 1, 3$ , and  $5 \text{ km}$  when  $t = 1000 \text{ day}$  after reservoir impoundment. The earthquake data from Table S1, the data are divided into four groups with the distance to the reservoir, and the legend inherited Figure 5.
